# Supplementary material for: Serum IgG2 levels are specifically associated with whole-body insulin-mediated glucose disposal in non-diabetic offspring of type 2 diabetic individuals: a cross-sectional study
Source: PubMed Central journal article supplement (PMC6134058; doi:10.1038/s41598-018-32108-8), 2018-09-11
Supplement: 41598_2018_32108_MOESM1_ESM.pdf [file 41598_2018_32108_MOESM1_ESM.pdf]

**Serum IgG2 levels are specifically associated with whole-body insulin-mediated glucose disposal in non-diabetic offspring of type 2 diabetic individuals: a cross-sectional study**

Teresa Vanessa Fiorentino<sup>a</sup>, Elena Succurro<sup>a</sup>, Franco Arturi<sup>a</sup>, Aida Giancotti<sup>b</sup>, Cinzia Peronace<sup>b</sup>, Angela Quirino<sup>b</sup>, Franz Sesti<sup>c</sup>, Francesco Andreozzi<sup>a</sup>, Marta Letizia Hribal<sup>a</sup>, Francesco Perticone<sup>a</sup>, Alfredo Focà<sup>b</sup>, Giorgio Sesti\*<sup>a</sup>

<sup>a</sup>Department of Medical and Surgical Sciences, University Magna Graecia of Catanzaro, Viale Europa, Catanzaro, 88100, Italy.

<sup>b</sup>Department of Health Sciences, “Magna Græcia” University of Catanzaro, Viale Europa, 88100 Catanzaro, Italy.

<sup>c</sup>Department of Experimental Medicine, Sapienza University of Rome, Rome, 00161, Italy

**Suppl Table 1 – Age and gender adjusted univariate correlations between IgG isotypes levels and anthropometric and metabolic variables in individuals with normal glucose tolerance**

|                                 | Total IgG (mg/ml)                     |             | IgG1 (mg/ml)                          |             | IgG2 (mg/ml)                          |         | IgG3 (mg/ml)                          |             | IgG4 (mg/ml)                          |         |
|---------------------------------|---------------------------------------|-------------|---------------------------------------|-------------|---------------------------------------|---------|---------------------------------------|-------------|---------------------------------------|---------|
|                                 | Pearson's correlation coefficient (r) | P value     | Pearson's correlation coefficient (r) | P value     | Pearson's correlation coefficient (r) | P value | Pearson's correlation coefficient (r) | P value     | Pearson's correlation coefficient (r) | P value |
| Age (yrs)                       | 0.02                                  | 0.78*       | -0.008                                | 0.90*       | 0.41                                  | 0.56*   | 0.02                                  | 0.78*       | -0.09                                 | 0.17*   |
| BMI (kg/m <sup>2</sup> )        | 0.05                                  | 0.22        | 0.07                                  | 0.18        | 0.06                                  | 0.19    | -0.06                                 | 0.18        | -0.03                                 | 0.33    |
| Waist circumference (cm)        | 0.009                                 | 0.45        | 0.02                                  | 0.40        | 0.04                                  | 0.28    | -0.07                                 | 0.15        | -0.05                                 | 0.24    |
| Fat body mass (%)               | 0.08                                  | 0.24        | 0.10                                  | 0.16        | 0.01                                  | 0.86    | -0.04                                 | 0.53        | 0.01                                  | 0.86    |
| Fat free mass (%)               | -0.06                                 | 0.40        | -0.08                                 | 0.25        | 0.008                                 | 0.90    | 0.06                                  | 0.42        | 0.01                                  | 0.89    |
| Systolic blood pressure (mmHg)  | 0.08                                  | 0.12        | 0.05                                  | 0.24        | 0.01                                  | 0.44    | 0.07                                  | 0.16        | 0.05                                  | 0.25    |
| Diastolic blood pressure (mmHg) | <b>0.15</b>                           | <b>0.02</b> | 0.08                                  | 0.11        | 0.01                                  | 0.41    | 0.07                                  | 0.13        | 0.10                                  | 0.07    |
| Total Cholesterol (mg/dl)       | 0.02                                  | 0.36        | 0.07                                  | 0.13        | -0.01                                 | 0.48    | 0.07                                  | 0.13        | 0.02                                  | 0.22    |
| HDL Cholesterol (mg/dl)         | -0.7                                  | 0.17        | -0.08                                 | -0.12       | -0.06                                 | 0.19    | -0.10                                 | 0.08        | -0.06                                 | 0.17    |
| Triglycerides (mg/dl)           | 0.08                                  | 0.25        | <b>0.14</b>                           | <b>0.05</b> | 0.07                                  | 0.30    | <b>0.15</b>                           | <b>0.03</b> | 0.08                                  | 0.22    |
| Fasting Glucose (mg/dl)         | 0.10                                  | 0.16        | 0.08                                  | 0.26        | 0.03                                  | 0.67    | -0.06                                 | 0.35        | 0.02                                  | 0.77    |
| 2-h glucose (mg/dl)             | 0.02                                  | 0.76        | 0.009                                 | 0.89        | 0.3                                   | 0.70    | -0.07                                 | 0.33        | -0.05                                 | 0.44    |
| HbA1c (%) [mmol/mol]            | -0.12                                 | 0.22        | -0.07                                 | 0.50        | -0.07                                 | 0.49    | 0.005                                 | 0.95        | 0.02                                  | 0.80    |
| hsCRP (mg/l)                    | 0.03                                  | 0.71        | -0.03                                 | 0.68        | 0.06                                  | 0.44    | -0.06                                 | 0.37        | -0.01                                 | 0.80    |

|                                                                                                   |              |              |       |      |              |              |        |      |        |      |
|---------------------------------------------------------------------------------------------------|--------------|--------------|-------|------|--------------|--------------|--------|------|--------|------|
| Complement C3 (g/l)                                                                               | <b>0.22</b>  | <b>0.007</b> | 0.14  | 0.04 | 0.10         | 0.09         | 0.05   | 0.26 | 0.03   | 0.36 |
| White blood cell count<br>( <i>cell/mm<sup>3</sup></i> )                                          | 0.02         | 0.37         | -0.08 | 0.11 | 0.08         | 0.12         | -0.02  | 0.39 | -0.03  | 4534 |
| Insulin-stimulated glucose<br>disposal ( <i>mg * min<sup>-1</sup> * kg<br/>FFM<sup>-1</sup></i> ) | -0.04        | 0.28         | -0.02 | 0.36 | <b>-0.14</b> | <b>0.02</b>  | -0.05  | 0.25 | -0.008 | 0.34 |
| HOMA-IR                                                                                           | 0.08         | 0.13         | 0.07  | 0.14 | 0.07         | 0.15         | 0.01   | 0.41 | -0.03  | 0.32 |
| Liver IR index                                                                                    | 0.12         | 0.12         | 0.11  | 0.15 | 0.10         | 0.19         | 0.13   | 0.08 | -0.04  | 0.58 |
| QUICKI                                                                                            | -0.09        | 0.21         | -0.08 | 0.26 | -0.07        | 0.32         | -0.007 | 0.91 | 0.03   | 0.68 |
| Glucose <sub>0-30</sub> (AUC) x<br>insulin <sub>0-30</sub> (AUC)                                  | 0.05         | 0.51         | 0.09  | 0.25 | 0.005        | 0.95         | 0.12   | 0.09 | -0.07  | 0.38 |
| Stumvoll ISI <sub>OGTT</sub>                                                                      | -0.12        | 0.07         | -0.01 | 0.46 | <b>-0.21</b> | <b>0.008</b> | 0.007  | 0.46 | -0.008 | 0.46 |
| Matsuda index                                                                                     | -0.13        | 0.04         | -0.11 | 0.07 | <b>-0.13</b> | <b>0.05</b>  | -0.08  | 0.14 | 0.01   | 0.40 |
| Gutt's ISI <sub>0,120</sub> index                                                                 | -0.13        | 0.04         | -0.12 | 0.09 | -0.11        | 0.16         | -0.05  | 0.49 | 0.02   | 0.82 |
| Muscle insulin sensitivity<br>index                                                               | <b>-0.18</b> | <b>0.04</b>  | -0.09 | 0.27 | <b>-0.18</b> | <b>0.03</b>  | -0.15  | 0.09 | 0.45   | 0.61 |

\**P* values refer to results after analyses with adjustment for gender. Triglycerides, HOMA-IR index, glucose<sub>0-30</sub> (AUC) x insulin<sub>0-30</sub> (AUC), Stumvoll ISI<sub>OGTT</sub>, Matsuda, Gutt's ISI<sub>0,120</sub>, Muscle insulin sensitivity index, and hsCRP levels were log transformed for statistical analysis.

BMI = body mass index; HbA1c = glycated hemoglobin; hsCRP = high sensitivity C reactive protein; HDL = high density lipoprotein; HOMA-IR = homeostasis model assessment insulin resistance; Liver IR = liver insulin resistance.

**Suppl. Table 2 – Age and gender adjusted univariate correlations between IgG isotypes levels and anthropometric and metabolic variables in individuals with prediabetes**

|                                 | Total IgG (mg/ml)                     |         | IgG1 (mg/ml)                          |             | IgG2 (mg/ml)                          |         | IgG3 (mg/ml)                          |         | IgG4 (mg/ml)                          |         |
|---------------------------------|---------------------------------------|---------|---------------------------------------|-------------|---------------------------------------|---------|---------------------------------------|---------|---------------------------------------|---------|
|                                 | Pearson's correlation coefficient (r) | P value | Pearson's correlation coefficient (r) | P value     | Pearson's correlation coefficient (r) | P value | Pearson's correlation coefficient (r) | P value | Pearson's correlation coefficient (r) | P value |
| Age (yrs)                       | -0.09                                 | 0.48*   | -0.15                                 | 0.21*       | -0.07                                 | 0.55*   | -0.02                                 | 0.89*   | 0.05                                  | 0.72*   |
| BMI (kg/m <sup>2</sup> )        | 0.13                                  | 0.29    | 0.18                                  | 0.16        | 0.10                                  | 0.45    | 0.11                                  | 0.39    | 0.08                                  | 0.53    |
| Waist circumference (cm)        | 0.16                                  | 0.21    | 0.22                                  | 0.09        | 0.09                                  | 0.47    | 0.05                                  | 0.68    | 0.04                                  | 0.73    |
| Fat body mass (%)               | 0.04                                  | 0.74    | 0.03                                  | 0.84        | 0.04                                  | 0.78    | -0.09                                 | 0.49    | 0.01                                  | 0.92    |
| Fat free mass (%)               | -0.22                                 | 0.08    | -0.14                                 | 0.27        | -0.01                                 | 0.91    | 0.001                                 | 0.99    | -0.01                                 | 0.90    |
| Systolic blood pressure (mmHg)  | 0.006                                 | 0.96    | -0.13                                 | 0.31        | -0.03                                 | 0.82    | -0.16                                 | 0.22    | -0.03                                 | 0.76    |
| Diastolic blood pressure (mmHg) | 0.06                                  | 0.66    | -0.02                                 | 0.88        | -0.06                                 | 0.64    | -0.04                                 | 0.76    | 0.06                                  | 0.65    |
| Total Cholesterol (mg/dl)       | -0.09                                 | 0.48    | -0.16                                 | 0.22        | -0.07                                 | 0.59    | -0.04                                 | 0.78    | -0.12                                 | 0.36    |
| HDL Cholesterol (mg/dl)         | -0.17                                 | 0.19    | <b>-0.26</b>                          | <b>0.04</b> | -0.06                                 | 0.62    | -0.15                                 | 0.25    | -0.14                                 | 0.28    |
| Triglyceride (mg/dl)            | 0.05                                  | 0.68    | -0.007                                | 0.95        | -0.07                                 | 0.58    | 0.07                                  | 0.55    | -0.08                                 | 0.50    |
| Fasting Glucose (mg/dl)         | -0.05                                 | 0.68    | -0.04                                 | 0.70        | 0.02                                  | 0.87    | -0.16                                 | 0.11    | -0.02                                 | 0.89    |
| 2-h glucose (mg/dl)             | 0.13                                  | 0.39    | 0.07                                  | 0.58        | 0.20                                  | 0.07    | 0.07                                  | 0.59    | 0.05                                  | 0.69    |
| HbA1c (%) [mmol/mol]            | -0.20                                 | 0.31    | -0.12                                 | 0.54        | -0.26                                 | 0.19    | 0.07                                  | 0.73    | 0.01                                  | 0.95    |
| hsCRP (mg/l)                    | 0.009                                 | 0.94    | 0.11                                  | 0.43        | 0.06                                  | 0.65    | 0.14                                  | 0.30    | -0.06                                 | 0.62    |

|                                                                                                   |       |      |       |      |              |             |       |      |        |      |
|---------------------------------------------------------------------------------------------------|-------|------|-------|------|--------------|-------------|-------|------|--------|------|
| Complement C3 (g/l)                                                                               | 0.03  | 0.82 | -0.07 | 0.64 | 0.03         | 0.83        | 0.22  | 0.13 | -0.09  | 0.55 |
| White blood cell count<br>( <i>cell/mm<sup>3</sup></i> )                                          | -0.03 | 0.79 | 0.03  | 0.80 | 0.16         | 0.11        | 0.19  | 0.08 | -0.05  | 0.69 |
| Insulin-stimulated glucose<br>disposal ( <i>mg * min<sup>-1</sup> * kg<br/>FFM<sup>-1</sup></i> ) | -0.13 | 0.15 | 0.03  | 0.39 | <b>-0.24</b> | <b>0.03</b> | -0.05 | 0.34 | -0.14  | 0.14 |
| HOMA-IR                                                                                           | 0.03  | 0.81 | 0.001 | 0.98 | 0.11         | 0.37        | 0.16  | 0.20 | 0.13   | 0.31 |
| Liver IR index                                                                                    | 0.12  | 0.40 | 0.14  | 0.31 | 0.04         | 0.77        | 0.07  | 0.65 | 0.09   | 0.52 |
| QUICKI                                                                                            | -0.03 | 0.82 | 0.06  | 0.62 | -0.13        | 0.32        | 0.20  | 0.12 | -0.13  | 0.31 |
| Glucose <sub>0-30</sub> (AUC) x<br>insulin <sub>0-30</sub> (AUC)                                  | 0.06  | 0.34 | 0.005 | 0.48 | -0.04        | 0.39        | 0.09  | 0.27 | 0.10   | 0.24 |
| Stumvoll ISI <sub>OGTT</sub>                                                                      | -0.03 | 0.42 | -0.08 | 0.28 | -0.12        | 0.21        | 0.02  | 0.45 | -0.12  | 0.21 |
| Matsuda index                                                                                     | -0.10 | 0.47 | 0.07  | 0.31 | -0.05        | 0.35        | 0.12  | 0.19 | -0.12  | 0.20 |
| Gutt's ISI <sub>0,120</sub> index                                                                 | -0.12 | 0.19 | 0.04  | 0.38 | -0.19        | 0.08        | 0.05  | 0.36 | -0.14  | 0.15 |
| Muscle insulin sensitivity<br>index                                                               | -0.13 | 0.46 | -0.03 | 0.87 | -0.15        | 0.42        | -0.10 | 0.58 | -0.008 | 0.96 |

\**P* values refer to results after analyses with adjustment for gender. Triglyceride, HOMA-IR index, glucose<sub>0-30</sub> (AUC) x insulin<sub>0-30</sub> (AUC), Stumvoll ISI<sub>OGTT</sub>, Matsuda, Gutt's ISI<sub>0,120</sub>, Muscle insulin sensitivity index and hsCRP levels were log transformed for statistical analysis.

BMI = body mass index; HbA1c = glycated hemoglobin; hsCRP = high sensitivity C reactive protein; HDL = high density lipoprotein; HOMA-IR = homeostasis model assessment insulin resistance; Liver IR = liver insulin resistance.
